# Supplementary material for: The crystal structure of bromide-bound GtACR1 reveals a pre-activated state in the transmembrane anion tunnel
Source: eLife. 2021 May 17;10:e65903. doi: 10.7554/eLife.65903 (PMC8172240; doi:10.7554/eLife.65903)
Supplement: Figure 2—source data 1. [file elife-65903-fig2-data1.xlsx]

## Sheet: Sheet1
Rectification index
WT		W246E	W246F	W250E	W250F
1.03827		2.60988	0.93609	1.21535	0.97537
0.98404		2.45156	1.18035	1.20581	0.86963
0.81351		1.3762	1.19637	1.36875	0.91079
0.89845		1.57172	1.05162	1.30294	1.01212
0.95187		2.27441	0.98972	1.16655	0.96915
0.92057		2.18387	1.03094	1.15897	0.99601
0.8861		1.66991	0.93647	1.24079	0.77374
0.5681			0.96614	1.30363
1.29014				1.29315
0.96856				1.08825
1.04664				1.10331
				1.43474
One Sample Wilcoxon Signed Rank Test p values for Median <>1
0.16817		0.02249	0.72629	0.00253	0.05191
Peak current @ 60 mV (nA)
WT		W246E	W246F	W250E	W250F
6.369		1.057	6.723	2.85	4.951
12.254		1.493	5.622	4.775	0.567
5.043		2.29	5.532	1.095	4.768
6.49		3.123	5.786	2.215	7.266
8.744		0.862	9.147	6.703	0.911
9.051		1.354	13.028	3.186	5.802
8.462		4.639	11.851	4.04	8.491
10.103			0.913	2.765	2.233
				1.341
				3.983
				4.571
				6.607
Mann-Whitney Test for Median Mutant <> Median WT
		0.00146	0.6365	0.00137	0.01359
Reversal potential (mV)
WT	P58E	W246E	W246F	W250E	W250F
73	74	72	74	80	83
72	70	65	74	80	80
75	63	80	74	69	75
76	74	71	78	77	81
77	80	86	86	74	73
85	89	74	72	81	74
74	84	78	70	78	78
67
90
91
82
80
78
86
95
Mann-Whitney Test for Median Mutant <> Median WT
	0.3406	0.19158	0.15706	0.5963	0.64635
